# Supplementary material for: A Tunable Nanoplatform of Nanogold Functionalised with Angiogenin Peptides for Anti-Angiogenic Therapy of Brain Tumours
Source: MDPI journal article supplement (doi:10.3390/cancers11091322), 2019-09-06
Supplement: s1 [file s1]

## Supplementary Materials

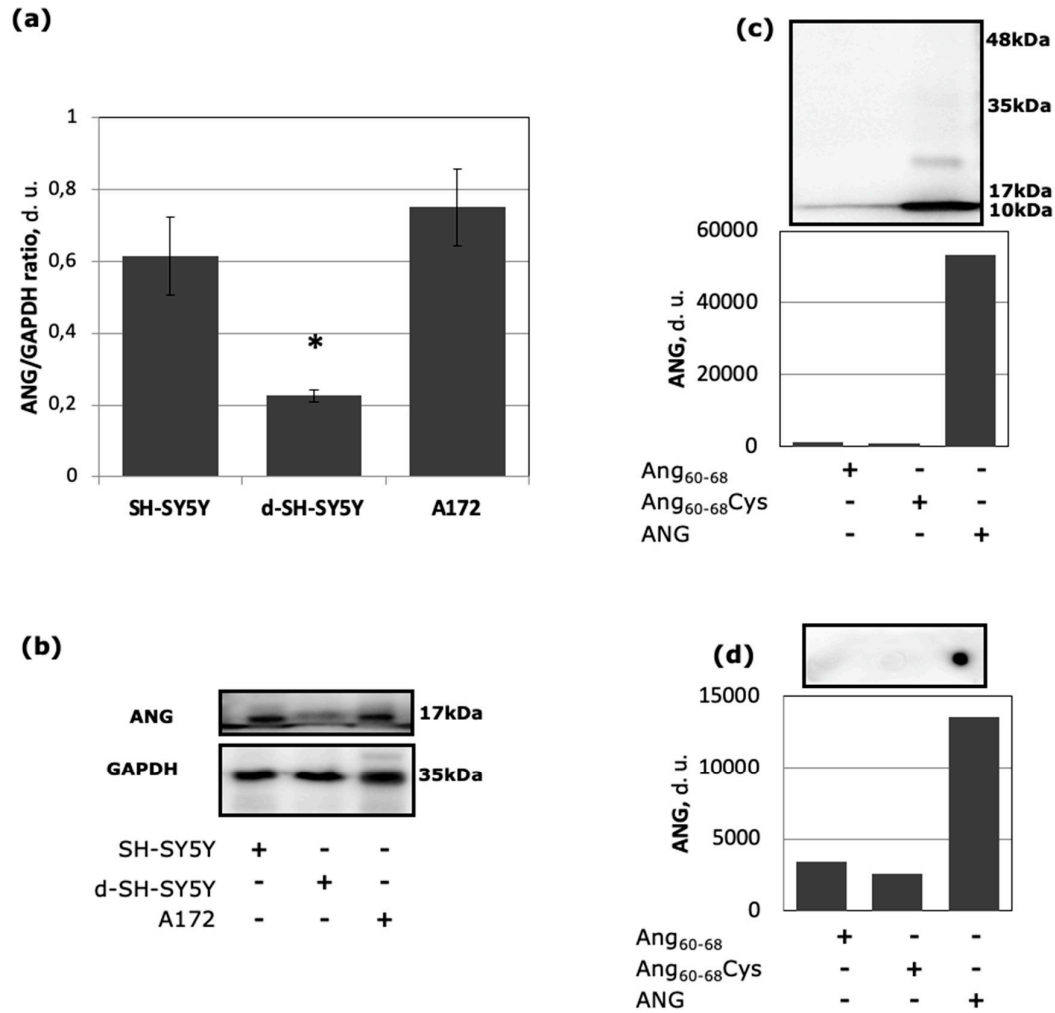

**Figure S1.** Densitometric analyses (a) and representative Western blot (b) of SH-SY5Y, differentiated SH-SY5Y and A172 cell lysates. Representative Western (c) and dot (d) blotting of Ang<sub>60-68</sub>, Ang<sub>60-68</sub>Cys and ANG. Nitrocellulose membranes were incubated with anti-angiogenin antibody. Each dot for Dot Blot analysis was loaded with 2  $\mu$ L of protein or peptide samples with concentration 0.2 mg/mL. The bars represent means  $\pm$  SD of three independent experiments performed in triplicate (S.D. = standard deviation). Statistically significant differences, determined by one-way ANOVA are indicated: \*  $p \leq 0.05$  versus both, undifferentiated SH-SY5Y and A172 cells.
